# Supplementary material
Source: MDPI journal article supplement (https://www.mdpi.com/2079-9276/13/4/50)
Supplement: s1 [file s1]

# The Circularity of Materials from the Perspective of a Product Life Cycle: A Life Cycle Assessment Case Study of Secondary Fence Boards – Part 1 (Baseline Scenario)

Joanna Kulczycka <sup>1</sup>, Anna Lewandowska <sup>2</sup>, Katarzyna Joachimiak-Lechman <sup>2,\*</sup> and Przemysław Kurczewski <sup>3</sup>

<sup>1</sup> Mineral and Energy Economy Research Institute, Polish Academy of Sciences, 31-261 Kraków, Poland; kulczycka@meeri.pl

<sup>2</sup> Institute of Management, Poznan University of Economics and Business, 61-875 Poznań, Poland; anna.lewandowska@ue.poznan.pl

<sup>3</sup> Faculty of Civil and Transport Engineering, Poznan University of Technology, 60-965 Poznań, Poland; przemyslaw.kurczewski@put.poznan.pl

\* Correspondence: katarzyna.joachimiak-lechman@ue.poznan.pl; Tel.: +48-61-854-31-21

**Table S1** Inventory results for life cycle stage Materials – auxiliary materials

| <b>MATERIALS - AUXILIARY MATERIALS</b><br>(wooden fence posts, wood preservative, steel screws, and steel bolts)                                       |          |                |
|--------------------------------------------------------------------------------------------------------------------------------------------------------|----------|----------------|
| Ecoinvent dataset ( <a href="https://ecoinvent.org/database/">https://ecoinvent.org/database/</a> )                                                    | Amount   | Unit           |
| Inputs                                                                                                                                                 |          |                |
| Sawnwood, beam, softwood, dried (u=10%), planed {Europe without Switzerland}   market for sawnwood, beam, softwood, dried (u=10%), planed   Cut-off, U | 0.004762 | m <sup>3</sup> |
| Wood preservative, creosote {RER}   market for wood preservative, creosote   Cut-off, U                                                                | 0.037278 | kg             |
| Steel, chromium steel 18/8 {GLO}   market for   Cut-off, U                                                                                             | 0.42     | kg             |

Source: own elaboration based in calculations SimaPro software

**Table S2** Inventory results for life cycle stage Transport to the installation place

| <b>TRANSPORT TO THE INSTALLATION PLACE</b>                                                                                              |                                                                                  |      |
|-----------------------------------------------------------------------------------------------------------------------------------------|----------------------------------------------------------------------------------|------|
| Ecoinvent dataset ( <a href="https://ecoinvent.org/database/">https://ecoinvent.org/database/</a> )                                     | Amount                                                                           | Unit |
| Inputs                                                                                                                                  |                                                                                  |      |
| Transport, freight, lorry 3.5–7.5 metric ton, euro6 {RER}   market for transport, freight, lorry 3.5–7.5 metric ton, EURO6   Cut-off, U | 8125.5<br>(Load: 70 kg board + 11.25 kg auxiliary materials<br>Distance: 100 km) | kgkm |

Source: own elaboration based in calculations SimaPro software

**Table S3** Inventory results for life cycle stage Installation and maintenance (15 years of lifetime)

| <b>INSTALATION AND MAINTENANCE</b><br>(drilling and screwing, maintenance of wooden posts, cleaning)     |               |             |
|----------------------------------------------------------------------------------------------------------|---------------|-------------|
| <b>Ecoinvent dataset (<a href="https://ecoinvent.org/database/">https://ecoinvent.org/database/</a>)</b> | <b>Amount</b> | <b>Unit</b> |
| <b>Inputs</b>                                                                                            |               |             |
| Wood preservative, creosote {RER}   market for wood preservative, creosote   Cut-off, U                  | 0.104         | kg          |
| Tap water {Europe without Switzerland}   market for   Cut-off, U                                         | 56            | kg          |
| Electricity, low voltage {PL}   market for   Cut-off, U                                                  | 0.058         | kWh         |
| <b>Outputs</b>                                                                                           |               |             |
| Wastewater, unpolluted {RoW}   market for wastewater, unpolluted   Cut-off, U                            | 56            | l           |

Source: own elaboration based in calculations SimaPro software

**Table S4** Inventory results for life cycle stage End of life - auxiliary materials (based on calculations with the CFF formula,  $R_{2\_wood} = 0.38$ ,  $A_{wood} = 0.8$ ,  $R_{2\_steel} = 0.85$ ,  $A_{steel} = 0.2$ , the fraction of the waste not sent for recycling is to be disposed of as follows: 99% landfilled and 1% incinerated)

| <b>END OF LIFE - AUXILIARY MATERIALS</b>                                                                                                                        |                                           |             |
|-----------------------------------------------------------------------------------------------------------------------------------------------------------------|-------------------------------------------|-------------|
| <b>Ecoinvent dataset (<a href="https://ecoinvent.org/database/">https://ecoinvent.org/database/</a>)</b>                                                        | <b>Amount</b>                             | <b>Unit</b> |
| <b>Inputs</b>                                                                                                                                                   |                                           |             |
| Transport, freight, lorry 7.5–16 metric ton, euro6 {RER}   market for transport, freight, lorry 7.5–16 metric ton, EURO6   Cut-off, U                           | 402<br>(Load: 4.2 kg<br>Distance: 100 km) | kgkm        |
| Sawnwood, beam, softwood, dried (u=10%), planed {Europe without Switzerland}   market for sawnwood, beam, softwood, dried (u=10%), planed   Cut-off, U (credit) | -0.00036                                  | m3          |
| Steel, chromium steel 18/8 {GLO}   market for   Cut-off, U (credit)                                                                                             | -0.286                                    | kg          |
| <b>Outputs</b>                                                                                                                                                  |                                           |             |
| Waste bulk iron, excluding reinforcement {Europe without Switzerland}   treatment of waste bulk iron, excluding reinforcement, sorting plant   Cut-off, U       | 0.286                                     | kg          |
| Waste brick {Europe without Switzerland}   treatment of waste brick, sorting plant   Cut-off, U (used as proxy)                                                 | 0.274                                     | kg          |
| Waste wood, untreated {RoW}   treatment of, sanitary landfill   Cut-off, U                                                                                      | 2.21                                      | kg          |
| Waste building wood, chrome preserved {RoW}   treatment of, municipal incineration   Cut-off, U                                                                 | 0.022                                     | kg          |
| Inert waste {Europe without Switzerland}   treatment of inert waste, sanitary landfill   Cut-off, U                                                             | 0.062                                     | kg          |
| Scrap steel {Europe without Switzerland}   treatment of scrap steel, municipal incineration   Cut-off, U                                                        | 0.001                                     | kg          |

Source: own elaboration based in calculations SimaPro software

**Table S5** Inventory results for life cycle stage End of life – secondary fence board  
(based on calculations with the CFF formula,  $R_{2\_fence\_board} = 0.499$ ,  $A_{fence\_board} = 0.5$  the fraction of the waste not sent for recycling is to be disposed of as follows: 99% landfilled and 1% incinerated)

| <b>END OF LIFE – SECONDARY FENCE BOARD – BASELINE SCENARIO 1A</b>                                                                     |                                               |             |
|---------------------------------------------------------------------------------------------------------------------------------------|-----------------------------------------------|-------------|
| (no recycling at the EoL)                                                                                                             |                                               |             |
| <b>Ecoinvent dataset (<a href="https://ecoinvent.org/database/">https://ecoinvent.org/database/</a>)</b>                              | <b>Amount</b>                                 | <b>Unit</b> |
| <i>Inputs</i>                                                                                                                         |                                               |             |
| Transport, freight, lorry 7.5–16 metric ton, euro6 {RER}   market for transport, freight, lorry 7.5–16 metric ton, EURO6   Cut-off, U | 2502<br>(Load: 25.025 kg<br>Distance: 100 km) | kgkm        |
| <i>Outputs</i>                                                                                                                        |                                               |             |
| Waste polyethylene {RoW}   treatment of waste polyethylene, sanitary landfill   Cut-off, U                                            | 7.45                                          | kg          |
| Waste polyethylene {RoW}   treatment of waste polyethylene, municipal incineration   Cut-off, U                                       | 0.05                                          | kg          |
| Waste polypropylene {RoW}   treatment of waste polypropylene, sanitary landfill   Cut-off, U                                          | 7.45                                          | kg          |
| Waste polypropylene {RoW}   treatment of waste polypropylene, municipal incineration   Cut-off, U                                     | 0.05                                          | kg          |
| Waste plastic, mixture {RoW}   treatment of waste plastic, mixture, sanitary landfill   Cut-off, U                                    | 2.483                                         | kg          |
| Waste plastic, mixture {RoW}   treatment of waste plastic, mixture, municipal incineration   Cut-off, U                               | 0.017                                         | kg          |
| Waste plastic, mixture {RoW}   treatment of waste plastic, mixture, sanitary landfill   Cut-off, U                                    | 2.483                                         | kg          |
| Waste plastic, mixture {RoW}   treatment of waste plastic, mixture, municipal incineration   Cut-off, U                               | 0.017                                         | kg          |
| Waste plastic, mixture {RoW}   treatment of waste plastic, mixture, sanitary landfill   Cut-off, U                                    | 2.483                                         | kg          |
| Waste plastic, mixture {RoW}   treatment of waste plastic, mixture, municipal incineration   Cut-off, U                               | 0.017                                         | kg          |
| Waste aluminium {RoW}   treatment of, sanitary landfill   Cut-off, U                                                                  | 2.483                                         | kg          |
| Scrap aluminium {Europe without Switzerland}   treatment of scrap aluminium, municipal incineration   Cut-off, U                      | 0.017                                         | kg          |
| <i>Total landfilling:</i>                                                                                                             | 24.75                                         | kg          |
| <i>Total incineration:</i>                                                                                                            | 0.245                                         | kg          |

Source: own elaboration based in calculations SimaPro software

**Table S6** The results of identification of the most relevant processes in the life cycle of secondary fence board (for the other most relevant impact categories)

| The most relevant impact categories | The most relevant processes<br>(only processes with the highest contribution listed)                                                       |                                                                                        |
|-------------------------------------|--------------------------------------------------------------------------------------------------------------------------------------------|----------------------------------------------------------------------------------------|
|                                     | Ecoinvent dataset ( <a href="https://ecoinvent.org/database/">https://ecoinvent.org/database/</a> )                                        | Share<br>(based on characterised results, recalculated by considering absolute values) |
| Ecotoxicity, freshwater             | Waste aluminium {RoW}   treatment of, sanitary landfill   Cut-off, U                                                                       | 54%                                                                                    |
|                                     | Blasting {RoW}   processing   Cut-off, U                                                                                                   | 13%                                                                                    |
|                                     | Blasting {RER}   processing   Cut-off, U                                                                                                   | 7%                                                                                     |
|                                     | Hard coal {CN}   hard coal mine operation and hard coal preparation   Cut-off, U                                                           | 5%                                                                                     |
|                                     | Polycarbonate {RoW}   production   Cut-off, U                                                                                              | 5%                                                                                     |
| Eutrophication, freshwater          | Spoil from lignite mining {GLO}   treatment of, in surface landfill   Cut-off, U                                                           | 61%                                                                                    |
|                                     | Spoil from hard coal mining {GLO}   treatment of, in surface landfill   Cut-off, U                                                         | 33%                                                                                    |
| Particulate matter                  | Polycarbonate {RoW}   production   Cut-off, U                                                                                              | 15%                                                                                    |
|                                     | Electricity, high voltage, for internal use in coal mining {CN}   electricity production, hard coal, at coal mine power plant   Cut-off, U | 12%                                                                                    |
|                                     | Nylon 6-6 {RER}   production   Cut-off, U                                                                                                  | 9%                                                                                     |
|                                     | Polycarbonate {RER}   production   Cut-off, U                                                                                              | 7%                                                                                     |
|                                     | Heat, district or industrial, other than natural gas {RoW}   heat production, at hard coal industrial furnace 1–10 MW   Cut-off, U         | 6%                                                                                     |
|                                     | Aluminium, primary, liquid {RoW}   aluminium production, primary, liquid, prebake   Cut-off, U                                             | 4%                                                                                     |
|                                     | Ethylene {RoW}   ethylene production, average   Cut-off, U                                                                                 | 4%                                                                                     |
|                                     | Acrylonitrile-butadiene-styrene copolymer {RoW}   production   Cut-off, U                                                                  | 4%                                                                                     |
|                                     | Propylene {RoW}   production   Cut-off, U                                                                                                  | 4%                                                                                     |
|                                     | + 10 other processes with low individual contribution (1–3%)                                                                               |                                                                                        |
| Acidification                       | Electricity, high voltage {PL}   heat and power co-generation, hard coal   Cut-off, U                                                      | 16%                                                                                    |
|                                     | Electricity, high voltage {RoW}   electricity production, hard coal   Cut-off, U                                                           | 11%                                                                                    |
|                                     | Electricity, high voltage {PL}   heat and power co-generation, lignite   Cut-off, U                                                        | 11%                                                                                    |

|  |                                                                                                                                    |    |
|--|------------------------------------------------------------------------------------------------------------------------------------|----|
|  | Nylon 6-6 {RER}   production   Cut-off, U                                                                                          | 8% |
|  | Polycarbonate {RoW}   production   Cut-off, U                                                                                      | 4% |
|  | Heat, district or industrial, other than natural gas {RoW}   heat production, at hard coal industrial furnace 1–10 MW   Cut-off, U | 4% |
|  | Ethylene {RoW}   ethylene production, average   Cut-off, U                                                                         | 3% |
|  | Propylene {RoW}   production   Cut-off, U                                                                                          | 2% |
|  | Polycarbonate {RER}   production   Cut-off, U                                                                                      | 2% |
|  | Acrylonitrile-butadiene-styrene copolymer {RoW}   production   Cut-off, U                                                          | 2% |
|  | + 21 other processes with very low individual contribution (0.4–2%)                                                                |    |

Source: own elaboration based on calculations in SimaPro 9.5. software
